# Supplementary material
Source: Springer Nature journal article supplement (https://www.springermedizin.de/resource/supplementary/12958_2010_735_MOESM3_ESM.pdf/9568368)

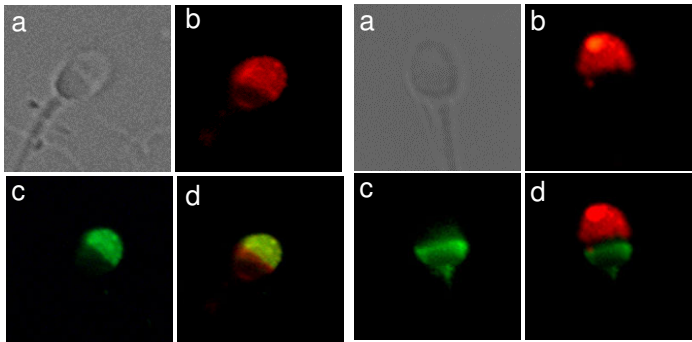

**A**

**B**

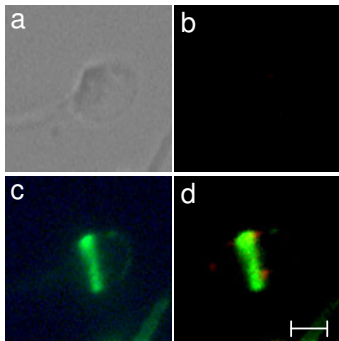

**C**

Supplement: MOESM3 [file 9568368]
